# Supplementary material for: Defining an additivity framework for mixture research in inducible whole-cell biosensors
Source: PubMed Central journal article supplement (PMC4660423; doi:10.1038/srep17200), 2015-11-26
Supplement: srep17200-s1.pdf [file srep17200-s1.pdf]

## Supplementary Material:

### *Defining an additivity framework for mixture research in inducible whole-cell biosensors*

Martin-Betancor, K<sup>1</sup>; Ritz, C<sup>2</sup>; Fernández-Piñas, F<sup>1</sup>; Leganés, F<sup>1</sup>; & Rodea-Palomares I<sup>1\*</sup>

<sup>1</sup> Department of Biology, Facultad de Ciencias, Universidad Autónoma de Madrid. 28049 Madrid, Spain.

<sup>2</sup> Department of Nutrition, Exercise and Sports, Faculty of Science, University of Copenhagen, Rolighedsvej 30, DK-1958 Frederiksberg C, Denmark.

\*Corresponding author: Ismael Rodea-Palomares

Mailing address: Departamento de Biología, Facultad de Ciencias, Universidad Autónoma de Madrid. C/ Darwin, 2. 28049, Madrid. Spain.

Tel.: +34 914978180

Fax: +34 914978344

E-mail: [ismael.rodea@uam.es](mailto:ismael.rodea@uam.es)

## Table of contents:

**Supplementary Material SM1 (Table).** Summary of non-linear models and estimated parameters

**Supplementary Material SM2 (Table).** *ED<sub>p</sub>* vectors (-50, 0, +50) for Cu, Cd, Zn, Cu, Hg and Co.

**Supplementary Material SM3 (Tutorial).** Complete non-monotonic dose-response profiles and analysis of departures from additivity based on Loewe additivity and Combination Index using R.

**Supplementary Material SM4 (Figure).** Effect of mixture ratio for the Zn:Cu binary mixture

**Supplementary Material SM5 (Table).** Combination index (CI) values for the dose (*D*) and empirical effect (*E*) dimensions together with relevant statistical information for 3 selected fractional effect levels (*p*) of the 15 binary metal mixtures of Cu, Cd, Zn, Cu, Hg and Co.

**Supplementary Material SM1 (Table).** Summary of non-linear models and estimated parameters together with relevant statistical information of the model fits for the response of *Synechococcus elongatus* PCC 7942 pBG2120 to 6 heavy metals and their binary mixtures (Zn, Cu, Cd, Ag, Co and Hg)

| Metal  | Model Function                      | Parameter estimates                  |                                     |                        |           | Residual Standard Error |           |
|--------|-------------------------------------|--------------------------------------|-------------------------------------|------------------------|-----------|-------------------------|-----------|
|        |                                     | Estimate value                       | Std.Error                           | t-value                | p-        |                         |           |
| Zn     | lgau2                               | b                                    | 0.351996                            | 0.048207               | 7.301822  | 0.0000                  | 0.1698429 |
|        |                                     | c                                    | 1.475965                            | 0.597634               | 2.469679  | 0.0199                  |           |
|        |                                     | d                                    | 80.099960                           | 9.894407               | 8.095479  | 0.0000                  |           |
|        |                                     | e                                    | 2.245102<br>(2245.102) <sup>a</sup> | 0.043678               | 51.401066 | 0.0000                  |           |
|        |                                     | f                                    | 2.662339                            | 0.829132               | 3.210994  | 0.0033                  |           |
|        |                                     | Cd                                   | lgau2                               | b                      | 0.562495  | 0.039451                |           |
| c      | 1.039686                            | 0.314707                             |                                     | 3.303666               | 0.0031    |                         |           |
| d      | 49.728622                           | 3.290085                             |                                     | 15.114693              | 0.0000    |                         |           |
| e      | 5.340496<br>(5340.496) <sup>a</sup> | 0.093375                             |                                     | 57.193828              | 0.0000    |                         |           |
| f      | 2.358463                            | 0.293418                             |                                     | 8.037883               | 0.0000    |                         |           |
| Ag     | gau2                                | b                                    |                                     | 0.1443642              | 0.0093814 | 15.3883702              | 0.0000    |
| c      |                                     | 1.3247561                            | 0.3296468                           | 4.0187134              | 0.0007    |                         |           |
| d      |                                     | 54.6960138                           | 3.3118291                           | 16.5153493             | 0.0000    |                         |           |
| e      |                                     | 0.3292834<br>(329.2834) <sup>a</sup> | 0.0045334                           | 72.6353256             | 0.0000    |                         |           |
| f      |                                     | 3.4229734                            | 0.4677340                           | 7.3182051              | 0.0000    |                         |           |
| Co     |                                     | lgau2                                | b                                   | 0.532205               | 0.066033  | 8.059677                | 0.0000    |
| c      | 0.955349                            |                                      | 0.336941                            | 2.835362               | 0.0119    |                         |           |
| d      | 18.297557                           |                                      | 1.270958                            | 14.396664              | 0.0000    |                         |           |
| e      | 2.413876<br>(2413.876) <sup>a</sup> |                                      | 0.084272                            | 28.643759              | 0.0000    |                         |           |
| f      | 2.028618                            |                                      | 0.403140                            | 5.032046               | 0.0001    |                         |           |
| Cu     | lgau2                               |                                      | b                                   | 0.24392                | 0.0096496 | 25.277                  | 0.0000    |
| c      |                                     | 0.40810                              | 0.18429                             | 2.2145                 | 0.0354    |                         |           |
| d      |                                     | 43.998                               | 1.6215                              | 27.134                 | 0.0000    |                         |           |
| e      |                                     | 0.046606<br>(46.606) <sup>a</sup>    | 0.00028072                          | 166.02                 | 0.0000    |                         |           |
| f      |                                     | 2.1294                               | 0.13881                             | 15.341                 | 0.0000    |                         |           |
| Hg     |                                     | lgau2                                | b                                   | 0.3284459 <sup>a</sup> | 0.0724137 | 4.5356872               | 0.0002    |
| c      | 0.9965343 <sup>a</sup>              |                                      | 0.5464225                           | 1.8237431              | 0.0818    |                         |           |
| d      | 33.5822889 <sup>a</sup>             |                                      | 2.9519420                           | 11.3763375             | 0.0000    |                         |           |
| e      | 0.0679623 <sup>a</sup>              |                                      | 0.0017048                           | 39.8664205             | 0.0000    |                         |           |
| f      | 1.0307636 <sup>a</sup>              |                                      | 0.1737224                           | 5.9333959              | 0.0000    |                         |           |
| Cu: Cd | Gau2                                |                                      | b                                   | 0.833872               | 0.087886  | 9.488139                | 0.0000    |
| c      |                                     | 1.587702                             | 0.559394                            | 2.838253               | 0.0098    |                         |           |
| d      |                                     | 32.661863                            | 2.571750                            | 12.700250              | 0.0000    |                         |           |
| e      |                                     | 2.526442                             | 0.039160                            | 64.515964              | 0.0000    |                         |           |
| f      |                                     | 2.226572                             | 0.326413                            | 6.821331               | 0.0000    |                         |           |
| Cu: Zn |                                     | Lgau2                                | b                                   | 0.210524               | 0.020723  | 10.159021               | 0.0000    |
| c      | 1.058583                            |                                      | 0.215034                            | 4.922875               | 0.0002    |                         |           |
| d      | 111.998627                          |                                      | 5.055904                            | 22.152047              | 0.0000    |                         |           |
| e      | 1.584642                            |                                      | 0.016992                            | 93.255607              | 0.0000    |                         |           |
| f      | 1.442243                            |                                      | 0.112803                            | 12.785522              | 0.0000    |                         |           |

|       |       |       |            |           |            |        |            |
|-------|-------|-------|------------|-----------|------------|--------|------------|
| Zn:Cd | Lgau2 | b     | 0.555188   | 0.015215  | 36.489732  | 0.0000 | 0.02654068 |
|       |       | c     | -0.290451  | 0.583670  | -0.497628  | 0.626  |            |
|       |       | d     | 42.910857  | 0.943991  | 45.456837  | 0.0000 |            |
|       |       | e     | 2.321820   | 0.012425  | 186.867587 | 0.0000 |            |
|       |       | f     | 2.024344   | 0.134982  | 14.997109  | 0.0000 |            |
|       |       | <hr/> |            |           |            |        |            |
| Cu:Hg | Lgau2 | b     | 0.6340408  | 0.0362401 | 17.4955546 | 0.0000 | 0.05278326 |
|       |       | c     | 2.2452456  | 0.3135964 | 7.1596667  | 0.0000 |            |
|       |       | d     | 74.6073845 | 3.0968760 | 24.0911760 | 0.0000 |            |
|       |       | e     | 0.0260586  | 0.0004689 | 55.5735249 | 0.0000 |            |
|       |       | f     | 3.1835757  | 0.3918444 | 8.1245914  | 0.0000 |            |
|       |       | <hr/> |            |           |            |        |            |
| Cu:Co | Gau2  | b     | 0.85374    | 0.010441  | 81.771     | 0.0000 | 0.03405409 |
|       |       | c     | 1.3777     | 0.13300   | 10.359     | 0.0000 |            |
|       |       | d     | 21.115     | 0.52473   | 40.239     | 0.0000 |            |
|       |       | e     | 1.4961     | 0.0070987 | 210.75     | 0.0000 |            |
|       |       | f     | 6.0718     | 0.35879   | 16.923     | 0.0000 |            |
|       |       | <hr/> |            |           |            |        |            |
| Co:Cd | Lgau2 | b     | 0.26824    | 0.0098237 | 27.305     | 0.0000 | 0.05352349 |
|       |       | c     | 1.8005     | 0.18445   | 9.7614     | 0.0000 |            |
|       |       | d     | 35.467     | 1.2264    | 28.920     | 0.0000 |            |
|       |       | e     | 3.2161     | 0.013300  | 241.81     | 0.0000 |            |
|       |       | f     | 2.8076     | 0.26146   | 10.738     | 0.0000 |            |
|       |       | <hr/> |            |           |            |        |            |
| Ag:Cd | Gau2  | b     | 0.59045    | 0.017055  | 34.620     | 0.0000 | 0.0487012  |
|       |       | c     | 1.4009     | 0.19988   | 7.0088     | 0.0000 |            |
|       |       | d     | 77.971     | 2.1637    | 36.037     | 0.0000 |            |
|       |       | e     | 2.7331     | 0.0078159 | 349.69     | 0.0000 |            |
|       |       | f     | 2.1606     | 0.079377  | 27.220     | 0.0000 |            |
|       |       | <hr/> |            |           |            |        |            |
| Cu:Ag | Lgau2 | b     | 0.34083    | 0.013952  | 24.429     | 0.0000 | 0.05808011 |
|       |       | c     | 1.8282     | 0.24210   | 7.5516     | 0.0000 |            |
|       |       | d     | 78.149     | 2.8113    | 27.798     | 0.0000 |            |
|       |       | e     | 0.20627    | 0.0010609 | 194.43     | 0.0000 |            |
|       |       | f     | 2.2139     | 0.12447   | 17.787     | 0.0000 |            |
|       |       | <hr/> |            |           |            |        |            |
| Zn:Ag | Gau2  | b     | 0.28513    | 0.0077488 | 36.797     | 0.0000 | 0.04642924 |
|       |       | c     | 1.1717     | 0.18042   | 6.4942     | 0.0000 |            |
|       |       | d     | 123.94     | 3.2011    | 38.717     | 0.0000 |            |
|       |       | e     | 1.5822     | 0.0039700 | 398.53     | 0.0000 |            |
|       |       | f     | 2.0776     | 0.061918  | 33.553     | 0.0000 |            |
|       |       | <hr/> |            |           |            |        |            |
| Co:Ag | Gau2  | b     | 0.40242    | 0.038248  | 10.521     | 0.0000 | 0.04745158 |
|       |       | c     | 1.7071     | 0.30221   | 5.6487     | 0.0000 |            |
|       |       | d     | 11.328     | 0.99761   | 11.356     | 0.0000 |            |
|       |       | e     | 1.0509     | 0.0099931 | 105.16     | 0.0000 |            |
|       |       | f     | 3.0655     | 0.74799   | 4.0984     | 0.0007 |            |
|       |       | <hr/> |            |           |            |        |            |
| Zn:Co | Gau2  | b     | 0.42157    | 0.0097373 | 43.295     | 0.0000 | 0.03552789 |
|       |       | c     | 1.7071     | 0.30221   | 5.6487     | 0.0000 |            |
|       |       | d     | 11.328     | 0.99761   | 11.356     | 0.0000 |            |
|       |       | e     | 2.0648     | 0.0047810 | 431.88     | 0.0000 |            |
|       |       | f     | 2.0479     | 0.054401  | 37.644     | 0.0000 |            |
|       |       | <hr/> |            |           |            |        |            |
| Cu:Hg | Lgau2 | b     | 0.6340408  | 0.0362401 | 17.49555   | 0.0000 | 0.05278326 |
|       |       | c     | 2.2452456  | 0.3135964 | 7.1596667  | 0.0000 |            |
|       |       | d     | 74.6073845 | 3.0968760 | 24.0911760 | 0.0000 |            |
|       |       | e     | 0.0260586  | 0.0004689 | 55.5735249 | 0.0000 |            |
|       |       | f     | 3.1835757  | 0.3918444 | 8.1245914  | 0.0000 |            |
|       |       | <hr/> |            |           |            |        |            |
| Cd:Hg | Lgau2 | b     | 0.335736   | 0.010892  | 30.824749  | 0.0000 | 0.03659033 |
|       |       | c     | 1.487436   | 0.158866  | 9.362838   | 0.0000 |            |
|       |       | d     | 71.957893  | 1.550272  | 46.416307  | 0.0000 |            |
|       |       | e     | 2.487738   | 0.017196  | 144.672177 | 0.0000 |            |
|       |       |       |            |           |            |        |            |

|       |       |   |            |            |           |        |            |
|-------|-------|---|------------|------------|-----------|--------|------------|
|       |       | f | 2.508632   | 0.142398   | 17.617043 | 0.0000 |            |
| Zn:Hg | Gau2  | b | 0.28384    | 0.015798   | 17.967    | 0.0000 | 0.07234654 |
|       |       | c | 1.3458     | 0.29692    | 4.5326    | 0.0001 |            |
|       |       | d | 154.63     | 8.0164     | 1.9290    | 0.0000 |            |
|       |       | e | 1.3592     | 0.0060743  | 223.76    | 0.0000 |            |
|       |       | f | 2.2107     | 0.13004    | 16.999    | 0.0000 |            |
| Hg:Co | Lgau2 | b | 0.464864   | 0.054759   | 8.489311  | 0.0000 | 0.05336395 |
|       |       | c | 2.154873   | 0.322521   | 6.681348  | 0.0000 |            |
|       |       | d | 65.070756  | 2.618477   | 24.850612 | 0.0000 |            |
|       |       | e | 0.754579   | 0.030447   | 24.783295 | 0.0000 |            |
|       |       | f | 2.812375   | 0.814988   | 3.450817  | 0.0000 |            |
| Hg:Ag | Gau2  | b | 0.071195   | 0.0014252  | 49.954    | 0.0000 | 0.02301    |
|       |       | c | -0.0050033 | 0.12298    | -0.040684 | 0.968  |            |
|       |       | d | 34.655     | 0.58610    | 59.128    | 0.0000 |            |
|       |       | e | 0.18673    | 0.00079776 | 234.07    | 0.0000 |            |
|       |       | f | 1.9507     | 0.062492   | 31.215    | 0.0000 |            |

<sup>a</sup> (nM)

gau and lgau refers to the Normal and log-normal biphasic dose-response models described in the gaussian {drc} functions in *drc* R package <sup>1</sup>. Parameter estimates and estimated residual standard errors are calculated using the function *drm* {drc} which is based on the function *optim* {stats} <sup>2</sup> which relies on the minimisation of the minus log likelihood function. For a quantitative response this reduces to least squares estimation, which is carried out by minimising the following sums of squares

$$\sum_{i=1}^N [w_i (y_i - f_i)]^2$$

where  $y_i$ ,  $f_i$ , and  $w_i$  correspond to the observed value, expected value, and the weight respectively, for the  $i$ th observation (from 1 to  $N$ ).

**Supplementary Material SM2 (Table).** *EDp* vectors (-50, 0, +50) for Cu, Cd, Zn, Cu, Hg and Co.

| Metal           | Fractional effect        | <i>EDp</i> ( $\mu\text{M}$ , BIF) |                   |
|-----------------|--------------------------|-----------------------------------|-------------------|
|                 |                          | <i>D(p)</i> ( $\mu\text{M}$ )     | <i>E(p)</i> (BIF) |
| Zn              | <i>ED</i> <sub>-50</sub> | 1.508±0.082                       | 40.79±3.33        |
|                 | <i>ED</i> <sub>0</sub>   | 2.8±0.11                          | 79.31±8.89        |
|                 | <i>ED</i> <sub>+50</sub> | 3.34±0.18                         | 4.79±7.38         |
| Cd              | <i>ED</i> <sub>-50</sub> | 2.8±0.11                          | 25.38±1.69        |
|                 | <i>ED</i> <sub>0</sub>   | 5.94±0.18                         | 49.24±3.03        |
|                 | <i>ED</i> <sub>+50</sub> | 10.19±0.39                        | 25.38±1.49        |
| Ag              | <i>ED</i> <sub>-50</sub> | 0.17±0.006                        | 28.01±1.79        |
|                 | <i>ED</i> <sub>0</sub>   | 0.37±0.013                        | 54.16±3.12        |
|                 | <i>ED</i> <sub>+50</sub> | 0.49±0.012                        | 28.01±4.39        |
| Co              | <i>ED</i> <sub>-50</sub> | 1.29±0.07                         | 9.63±15           |
|                 | <i>ED</i> <sub>0</sub>   | 2.61±0.1                          | 18.12±1.17        |
|                 | <i>ED</i> <sub>+50</sub> | 4.51±0.24                         | 9.63±0.76         |
| Cu              | <i>ED</i> <sub>-50</sub> | 0.035±0.0004                      | 22.2±0.97         |
|                 | <i>ED</i> <sub>0</sub>   | 0.048±0.0003                      | 43.56±1.53        |
|                 | <i>ED</i> <sub>+50</sub> | 0.062±0.0007                      | 22.2±0.95         |
| Hg <sup>a</sup> | <i>ED</i> <sub>-50</sub> | 0.043±0.003                       | 17.29±1.24        |
|                 | <i>ED</i> <sub>0</sub>   | 0.068±0.001                       | 33.25±3.04        |
|                 | <i>ED</i> <sub>+50</sub> | 0.11±0.008                        | 17.29±1.08        |

±: Standard error. Standard error are estimated from the non-linear fitted model. Fitted non-linear models and estimated parameters can be found in Table SM1.

<sup>a</sup> (nM).

## Supplementary Material SM3 (Tutorial)

### Fitting non-monotonic dose-response with differential maximal effects and analysis of departures from additivity based on multivariate Loewe additivity using R.

From: *Defining an additivity framework for mixture research in inducible whole-cell biosensors.*

Martin-Betancor, K<sup>1</sup>; Ritz, C<sup>2</sup>; Fernández-Piñas, F<sup>1</sup>; Leganés, F<sup>1</sup>; & Rodea-Palomares I<sup>1\*</sup>

<sup>1</sup> Department of Biology, Facultad de Ciencias, Universidad Autónoma de Madrid. 28049 Madrid, Spain.

<sup>2</sup> Department of Nutrition, Exercise and Sports, Faculty of Science, University of Copenhagen, Rolighedsvej 30, DK-1958 Frederiksberg C, Denmark.

\*Corresponding author: Ismael Rodea-Palomares

Mailing address: Departamento de Biología, Facultad de Ciencias, Universidad Autónoma de Madrid. C/ Darwin, 2. 28049, Madrid. Spain.

Tel.: +34 914978180

Fax: +34 914978344

E-mail: [ismael.rodea@uam.es](mailto:ismael.rodea@uam.es)

---

A novel additivity framework for mixture-effect research in the framework of whole-cell inducible biosensors has been mathematically developed. The method proposes a multivariate extension of the effective dose (*ED<sub>p</sub>*) notation in order to take into account the occurrence of differential maximal effects and inhibition beyond the maximum permissive concentrations (MPCs). This allow a dimensional extension of Loewe additivity which enables its direct application in a biphasic dose-response framework. The utilities that allow to achieve this new approach have been incorporated in the (*drc*) package for R<sup>1</sup>.

#### #Example data:

The dataset “metaldata.csv” and the functional R-script “SM3\_Script\_R.R” used in the present example are freely available from <http://dx.doi.org/10.6084/m9.figshare.1476176>

In the present tutorial, we will explain how to use the novel method developed in order to model dose-response profiles of an inducible whole cell biosensor to individual *stimuli* and mixtures (in the present case, different heavy metals). We will analyse the “metaldata.csv” dataset. This dataset includes the raw data resulted from the individual exposure of the inducible whole cell biosensor *Synechococcus elongatus* PCC 7942 pBG2120<sup>3</sup> to six metals and their 15 possible binary combinations.

The dataset is importable as data.frame in R as follows: (from the root directory:

```
metaldata<-read.csv(file="metaldata.csv")
```

The data frame have 3 variables: “metal” (factor), “conc” (numeric), “IR” (induction factor, the same asBIF in the main text) (numeric). In the tutorial, we will explain the *drc* extension using the data for Zn, Cd and its mixture, ZnCd.

#### #Make a subset with the Zn data

```
Zn <- metaldata[metaldata$metal=="Zn",]
```

```
Zn
```

|    | metal | conc    | IR         |
|----|-------|---------|------------|
| 1  | Zn    | 0.0369  | 0.9142857  |
| 2  | Zn    | 0.0369  | 0.9756098  |
| 3  | Zn    | 0.0369  | 0.8974359  |
| 4  | Zn    | 0.0925  | 0.9523810  |
| 5  | Zn    | 0.0925  | 0.8780488  |
| 6  | Zn    | 0.0925  | 1.1666667  |
| 7  | Zn    | 0.1859  | 0.9523810  |
| 8  | Zn    | 0.1859  | 1.1707317  |
| 9  | Zn    | 0.1859  | 1.2115385  |
| 10 | Zn    | 0.5693  | 1.7523810  |
| 11 | Zn    | 0.5693  | 1.6585366  |
| 12 | Zn    | 0.5693  | 1.7948718  |
| 13 | Zn    | 0.9684  | 5.9809524  |
| 14 | Zn    | 0.9684  | 4.6341463  |
| 15 | Zn    | 0.9684  | 4.8461538  |
| 16 | Zn    | 1.3836  | 14.2857143 |
| 17 | Zn    | 1.3836  | 19.7073171 |
| 18 | Zn    | 1.3836  | 22.7051282 |
| 19 | Zn    | 1.4472  | 43.9500000 |
| 20 | Zn    | 1.4472  | 44.0869565 |
| 21 | Zn    | 1.4472  | 43.2000000 |
| 22 | Zn    | 2.0371  | 67.1238095 |
| 23 | Zn    | 2.0371  | 74.0975610 |
| 24 | Zn    | 2.0371  | 86.0192308 |
| 25 | Zn    | 3.2111  | 31.1619048 |
| 26 | Zn    | 3.2111  | 61.2195122 |
| 27 | Zn    | 3.2111  | 64.6153846 |
| 28 | Zn    | 4.4946  | 3.8857143  |
| 29 | Zn    | 4.4946  | 4.8292683  |
| 30 | Zn    | 4.4946  | 5.3846154  |
| 31 | Zn    | 10.7532 | 0.3428571  |
| 32 | Zn    | 10.7532 | 0.5853659  |
| 33 | Zn    | 10.7532 | 0.6730769  |

### #Fitting biphasic dose-response profiles:

Inducible whole cell biosensors usually present inverted v-shaped biphasic dose-response profiles. This specific type of dose-response pattern may be fitted using nonlinear regression model equations as Gaussian (gau) or LogGaussian (lgau) with or without the use of variance-stabilizing Box-Cox transform-both-sides approach. (For more detail see section 2.1 *Fitting biphasic dose-response profiles* of the manuscript).

### #gaussian function:

```
Zn.gau <- drm(IR~conc, data=Zn, fct=gaussian(), na.action=na.omit)
```

```
summary(Zn.gau)
```

Model fitted: Gaussian (5 parms)

Parameter estimates:

|               | Estimate   | Std. Error | t-value    | p-value |
|---------------|------------|------------|------------|---------|
| b:(Intercept) | 8.8613e-01 | 9.3682e-03 | 9.4589e+01 | 0.0000  |
| c:(Intercept) | 2.1660e+00 | 1.2821e+00 | 1.6895e+00 | 0.1022  |
| d:(Intercept) | 7.5746e+01 | 3.3920e+00 | 2.2331e+01 | 0.0000  |
| e:(Intercept) | 2.3418e+00 | 8.6316e-03 | 2.7131e+02 | 0.0000  |

```
f:(Intercept) 1.3880e+01 2.8981e+00 4.7894e+00 0.0000
```

Residual standard error:

5.87511 (28 degrees of freedom)

For complete information of the `drm {drc}` consult the tutorial of `drc` package <http://cran.r-project.org/web/packages/drc/index.html>

### # Model checking

Best-fit models can be selected based on the residual standard error that is indicated in the model summary. For visual observation they can be plotted:

```
plot(fitted(Zn.gau), residuals(Zn.gau), ylim = c(-20, 20))
```

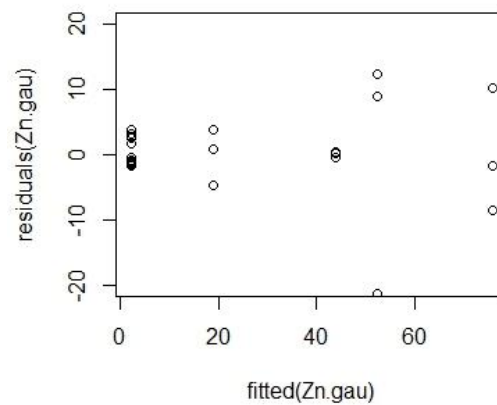

### # Gaussian function with Box-Cox transform

```
Zn.gau2 <- drm(IR~conc, data=Zn, fct=gaussian(), na.action=na.omit, bcVal = 0, bcAdd = 10)
```

```
summary(Zn.gau2)
```

Model fitted: Gaussian (5 parms)

Parameter estimates:

|               | Estimate  | Std. Error | t-value   | p-value |
|---------------|-----------|------------|-----------|---------|
| b:(Intercept) | 0.793259  | 0.075520   | 10.503961 | 0.0000  |
| c:(Intercept) | 1.613775  | 0.500908   | 3.221697  | 0.0032  |
| d:(Intercept) | 81.080825 | 10.982114  | 7.382989  | 0.0000  |
| e:(Intercept) | 2.422227  | 0.042576   | 56.892278 | 0.0000  |
| f:(Intercept) | 3.115795  | 0.624967   | 4.985533  | 0.0000  |

Residual standard error:

0.17677 (28 degrees of freedom)

Non-normality/heterogeneity adjustment through optimal Box-Cox transformation

Specified lambda: 0



### # Model checking

```
plot(fitted(Zn.gau2), residuals(Zn.gau2), ylim = c(-0.4, 0.4))
```

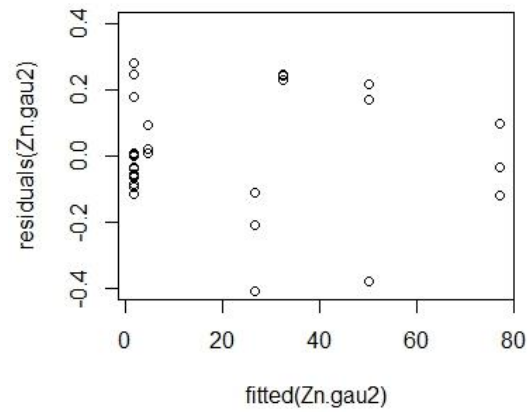

### #lgaussian function

```
Zn.lgau <- drm(IR~conc, data=Zn, fct=lgaussian(), na.action=na.omit)
summary(Zn.lgau)
```

Model fitted: Log-Gaussian (5 parms)

Parameter estimates:

|               | Estimate   | Std. Error | t-value    | p-value |
|---------------|------------|------------|------------|---------|
| b:(Intercept) | 4.0134e-01 | 6.4603e-03 | 6.2124e+01 | 0.0000  |
| c:(Intercept) | 2.1661e+00 | 1.2821e+00 | 1.6895e+00 | 0.1022  |
| d:(Intercept) | 7.5747e+01 | 3.3920e+00 | 2.2331e+01 | 0.0000  |
| e:(Intercept) | 2.1746e+00 | 1.2839e-02 | 1.6938e+02 | 0.0000  |
| f:(Intercept) | 9.1066e+00 | 1.8773e+00 | 4.8510e+00 | 0.0000  |

Residual standard error:

5.87511 (28 degrees of freedom)

### #Model checking

```
plot(fitted(Zn.lgau), residuals(Zn.lgau), ylim = c(-20, 20))
```

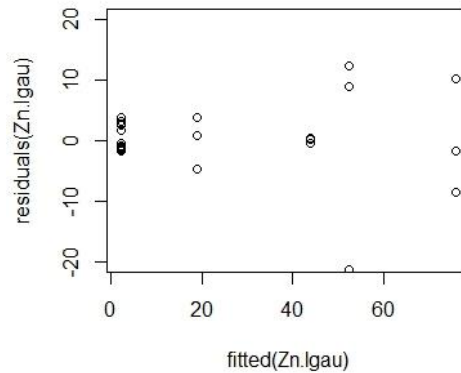

### # lgaussian function with Box-Cox transform

```
Zn.lgau2 <- drm(IR~conc, data=Zn, fct=lgaussian(), na.action=na.omit, bcVal = 0, bcAdd = 10)
```

```
summary(Zn.lgau2)
```

Model fitted: Log-Gaussian (5 parms)

Parameter estimates:

|               | Estimate  | Std. Error | t-value   | p-value |
|---------------|-----------|------------|-----------|---------|
| b:(Intercept) | 0.351996  | 0.048207   | 7.301822  | 0.0000  |
| c:(Intercept) | 1.475965  | 0.597634   | 2.469679  | 0.0199  |
| d:(Intercept) | 80.099960 | 9.894407   | 8.095479  | 0.0000  |
| e:(Intercept) | 2.245102  | 0.043678   | 51.401066 | 0.0000  |
| f:(Intercept) | 2.662339  | 0.829132   | 3.210994  | 0.0033  |

Residual standard error:

0.1698429 (28 degrees of freedom)

Non-normality/heterogeneity adjustment through optimal Box-Cox transformation

Specified lambda: 0

### #Model checking

```
plot(fitted(Zn.lgau2), residuals(Zn.lgau2), ylim = c(-0.4, 0.4))
```

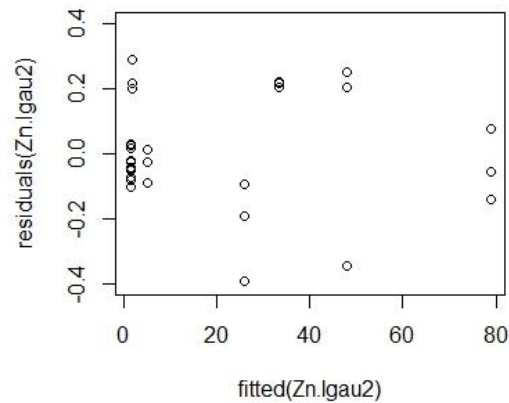

### #plot:

We can visually observe all the functions used in order to have a visual overview of the models fitted.

```
plot(Zn.gau, type = "obs", col= "black", log = "")
plot(Zn.gau, type = "none", add = TRUE, col = "red")
plot(Zn.gau2, type = "none", add = TRUE, col = "yellow")
plot(Zn.lgau, type = "none", add = TRUE, col = "blue")
plot(Zn.lgau2, type = "none", add = TRUE, col = "green")
```

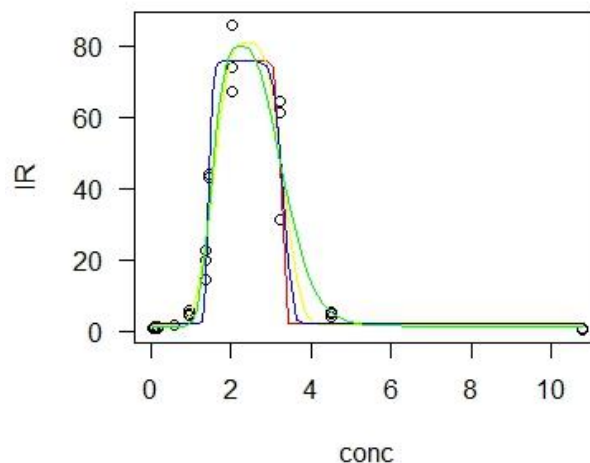

Based on the residuals standard errors and the visual examination, we can conclude that the LogGaussian with Box-Cox modification (green line) is the model that fit better the experimental data, therefore it will be used for fitting Zn response in the rest of calculations.

### #Effective doses ( $ED_p$ ) calculation:

Using the `ED {drc}` function, we can get the  $D(p)$  vectors at any desired fractional effect  $p$ . We selected the three representative  $p$  levels: -50 (half of the  $E_{max}$ , in the induction region), 99.9 ( $E_{max}$ ) and +50 (half of the  $E_{max}$ , in the inhibition region) (*Equivalent to the -50, 0, +50  $p$  levels in the manuscript*). For more details, see section 2.2 *a multivariate extension of the effective dose notation of the manuscript*. Note: to get the  $E(p)$  values, for the moment it is required to use the `indicesFct {drc}` function which will be described in next sections.

```
ED(Zn.lgau2, -50, interval = "delta", bound = FALSE)
```

```
Estimate Std. Error Lower Upper
1:-50 1.508038 0.082849 1.338329 1.6777
```

```
ED(Zn.lgau2, 99.9,interval = "delta")
```

```
Estimate Std. Error Lower Upper
1:99.9 2.32300 0.10458 2.10877 2.5372
```

```
ED(Zn.lgau2, 50, interval = "delta")
```

```
Estimate Std. Error Lower Upper
1:50 3.34241 0.18363 2.96627 3.7186
```

#### #Cd fit:

Now, we are going to fit the second data component, in that case, Cd. For that, we use the same steps as for Zn.

#### #Make a subset with the Cd data

```
Cd <- metaldata[metaldata$metal=="Cd",]
```

```
Cd
```

#### #Fitting biphasic dose-response profiles:

#### #gaussian function

```
Cd.gau <- drm(IR~conc, data=Cd, fct=gaussian(), na.action=na.omit)
```

```
summary(Cd.gau)
```

```
Model fitted: Gaussian (5 parms)
```

```
Parameter estimates:
```

```
Estimate Std. Error t-value p-value
b:(Intercept) 4.079689 0.115139 35.432648 0.0000
c:(Intercept) 1.283627 1.275138 1.006657 0.3246
d:(Intercept) 42.981885 1.907644 22.531393 0.0000
e:(Intercept) 6.850150 0.070015 97.838717 0.0000
f:(Intercept) 7.805005 3.237173 2.411056 0.0243
```

```
Residual standard error:
```

```
4.4849 (23 degrees of freedom)
```

#### #Model checking

```
plot(fitted(Cd.gau), residuals(Cd.gau), ylim = c(-10, 10))
```

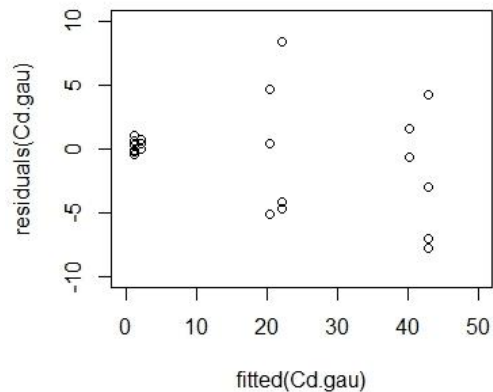

### #Gaussian function with Box-Cox transform

```
Cd.gau2 <- drm(IR~conc, data=Cd, fct=gaussian(), na.action=na.omit, bcVal = 0, bcAdd = 10)
```

```
summary(Cd.gau2)
```

Model fitted: Gaussian (5 parms)

Parameter estimates:

|               | Estimate  | Std. Error | t-value    | p-value |
|---------------|-----------|------------|------------|---------|
| b:(Intercept) | 4.056422  | 0.090069   | 45.036766  | 0.0000  |
| c:(Intercept) | 1.202271  | 0.352358   | 3.412072   | 0.0024  |
| d:(Intercept) | 42.700145 | 2.340528   | 18.243805  | 0.0000  |
| e:(Intercept) | 6.851570  | 0.053432   | 128.230478 | 0.0000  |
| f:(Intercept) | 7.234677  | 1.057973   | 6.838241   | 0.0000  |

Residual standard error:

0.1088791 (23 degrees of freedom)

Non-normality/heterogeneity adjustment through optimal Box-Cox transformation

Specified lambda: 0

### #Model checking

```
plot(fitted(Cd.gau2), residuals(Cd.gau2), ylim = c(-0.2, 0.2))
```

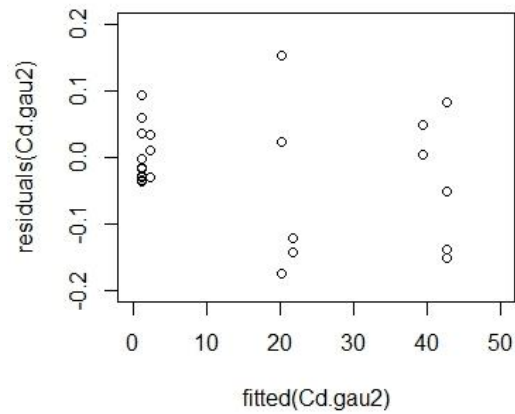

### #lgaussian function

```
Cd.lgau <- drm(IR~conc, data=Cd, fct=lgaussian(), na.action=na.omit)
```

```
summary(Cd.lgau)
```

Model fitted: Log-Gaussian (5 parms)

Parameter estimates:

|               | Estimate  | Std. Error | t-value   | p-value |
|---------------|-----------|------------|-----------|---------|
| b:(Intercept) | 0.544683  | 0.032578   | 16.719520 | 0.0000  |
| c:(Intercept) | 0.806563  | 0.920847   | 0.875893  | 0.3901  |
| d:(Intercept) | 51.009281 | 2.143174   | 23.800808 | 0.0000  |
| e:(Intercept) | 5.315768  | 0.093498   | 56.854176 | 0.0000  |
| f:(Intercept) | 2.105116  | 0.261655   | 8.045382  | 0.0000  |

Residual standard error:

3.086809 (23 degrees of freedom)

### #Model checking

```
plot(fitted(Cd.lgau), residuals(Cd.lgau), ylim = c(-6, 6), xlim = c(0, 50))
```

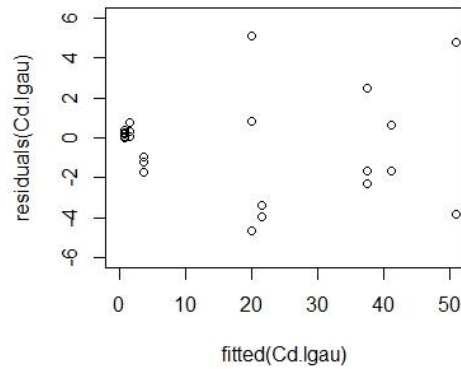

### #lgaussian function with Box-Cox transform

```
Cd.lgau2 <- drm(IR~conc, data=Cd, fct=lgaussian(), na.action=na.omit, bcVal = 0, bcAdd = 10)
```

```
summary(Cd.lgau2)
```

Model fitted: Log-Gaussian (5 parms)

Parameter estimates:

|               | Estimate  | Std. Error | t-value   | p-value |
|---------------|-----------|------------|-----------|---------|
| b:(Intercept) | 0.562495  | 0.039451   | 14.258093 | 0.0000  |
| c:(Intercept) | 1.039686  | 0.314707   | 3.303666  | 0.0031  |
| d:(Intercept) | 49.728622 | 3.290085   | 15.114693 | 0.0000  |
| e:(Intercept) | 5.340496  | 0.093375   | 57.193828 | 0.0000  |
| f:(Intercept) | 2.358463  | 0.293418   | 8.037883  | 0.0000  |

Residual standard error:

0.09005292 (23 degrees of freedom)

Non-normality/heterogeneity adjustment through optimal Box-Cox transformation

Specified lambda: 0

### #Model checking

```
plot(fitted(Cd.lgau2), residuals(Cd.lgau2), ylim = c(-0.3, 0.3))
```

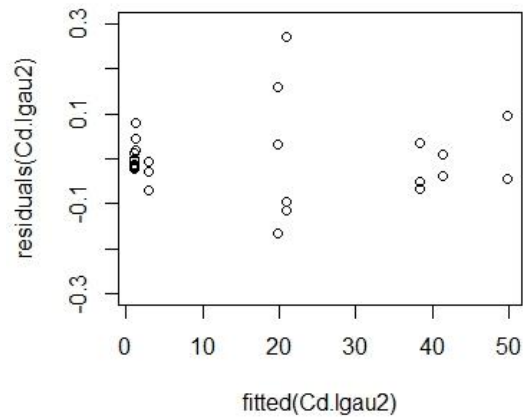

**#plot:**

```
plot(Cd.gau, type = "obs", col= "black", log = "", ylim = c(0, 60))
plot(Cd.gau, type = "none", add = TRUE, col = "red")
plot(Cd.gau2, type = "none", add = TRUE, col = "yellow")
plot(Cd.lgau, type = "none", add = TRUE, col = "blue")
plot(Cd.lgau2, type = "none", add = TRUE, col = "green")
```

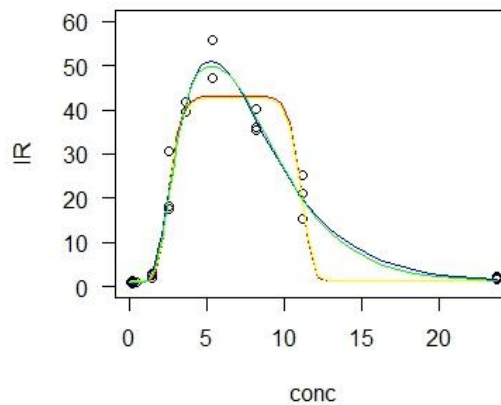

Based on the residuals standard errors and the visual examination, we can observed that the LogGaussian with Box-Cox modification (green line) is the model that fits better Cd experimental data, therefore it will be used for fitting Cd response in the rest of calculations.

**#Effective doses ( $D(p)$ ) calculation:**

```
ED(Cd.lgau2, -50, interval = "delta", bound = FALSE)
```

|       | Estimate | Std. Error | Lower   | Upper  |
|-------|----------|------------|---------|--------|
| 1:-50 | 2.79902  | 0.10714    | 2.57737 | 3.0207 |



```
ED(Cd.lgau2, 99.9,interval = "delta")
```

```
Estimate Std. Error Lower Upper  
1:99.9 5.56039 0.11333 5.32594 5.7948
```

```
ED(Cd.lgau2, 50,interval = "delta")
```

```
Estimate Std. Error Lower Upper  
1:50 10.18961 0.39005 9.38273 10.996
```

### #Fitting mixture data:

In order to predict the biosensor response to any combination of the individual metals and also, to be able to analyse departures from additivity, it is required to fit the mixture data to a nonlinear regression model equation. Zn and Cd mixture data are used as example.

#### # Make a subset with the ZnCd data

```
ZnCd <- metaldata[metaldata$metal=="ZnCd",]
```

#### #gaussian function

```
ZnCd.gau <- drm(IR~conc, data=ZnCd, fct=gaussian(), na.action=na.omit)
```

```
summary(ZnCd.gau)
```

```
Model fitted: Gaussian (5 parms)
```

```
Parameter estimates:
```

```
Estimate Std. Error t-value p-value  
b:(Intercept) 9.1892e-03 NA NA NA  
c:(Intercept) 2.3311e+00 1.1228e+00 2.0760e+00 0.0555  
d:(Intercept) 1.0401e+03 NA NA NA  
e:(Intercept) 2.8890e+00 2.3606e-02 1.2239e+02 0.0000  
f:(Intercept) 4.1168e-01 1.6657e-02 2.4716e+01 0.0000
```

```
Residual standard error:
```

```
2.123171 (15 degrees of freedom)
```

#### #Model checking

```
plot(fitted(ZnCd.gau), residuals(ZnCd.gau))
```

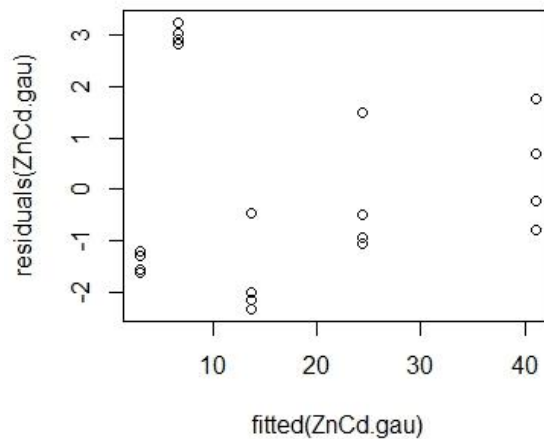

### #Gaussian function with Box-Cox transform

```
ZnCd.gau2 <- drm(IR~conc, data=ZnCd, fct=gaussian(), na.action=na.omit, bcVal = 0, bcAdd = 10)
```

```
summary(ZnCd.gau2)
```

Model fitted: Gaussian (5 parms)

Parameter estimates:

|               | Estimate   | Std. Error | t-value   | p-value |
|---------------|------------|------------|-----------|---------|
| b:(Intercept) | 0.040441   | 0.032399   | 1.248238  | 0.2311  |
| c:(Intercept) | 0.561210   | 1.249161   | 0.449269  | 0.6597  |
| d:(Intercept) | 330.288516 | 136.118307 | 2.426481  | 0.0283  |
| e:(Intercept) | 2.899675   | 0.049022   | 59.151001 | 0.0000  |
| f:(Intercept) | 0.473996   | 0.074228   | 6.385670  | 0.0000  |

Residual standard error:

0.1078746 (15 degrees of freedom)

Non-normality/heterogeneity adjustment through optimal Box-Cox transformation

Specified lambda: 0

### #Model checking

```
plot(fitted(ZnCd.gau2), residuals(ZnCd.gau2), ylim = c(-0.15, 0.15))
```

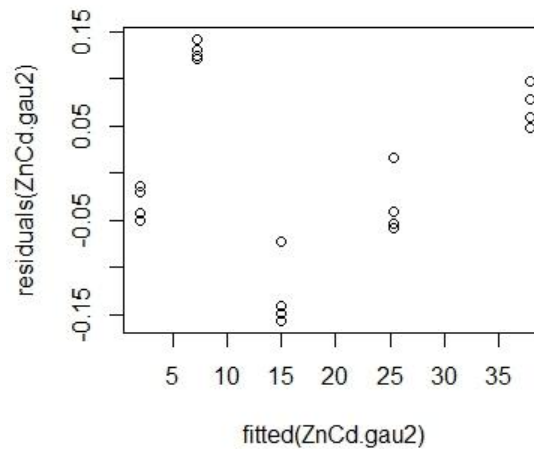

### #lgaussian function

```
ZnCd.lgau <- drm(IR~conc, data=ZnCd, fct=lgaussian(), na.action=na.omit)
```

```
summary(ZnCd.lgau)
```

Model fitted: Log-Gaussian (5 parms)

Parameter estimates:

|               | Estimate  | Std. Error | t-value    | p-value |
|---------------|-----------|------------|------------|---------|
| b:(Intercept) | 0.555663  | 0.015419   | 36.038564  | 0.0000  |
| c:(Intercept) | -0.274800 | 1.032831   | -0.266065  | 0.7938  |
| d:(Intercept) | 42.904780 | 0.747360   | 57.408441  | 0.0000  |
| e:(Intercept) | 2.321479  | 0.018413   | 126.077969 | 0.0000  |
| f:(Intercept) | 2.028462  | 0.164444   | 12.335300  | 0.0000  |

Residual standard error:

0.834502 (15 degrees of freedom)

### #Model checking

```
plot(fitted(ZnCd.lgau), residuals(ZnCd.lgau), ylim = c(-2, 2))
```

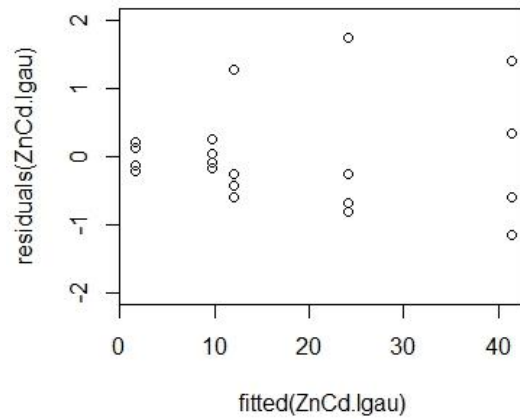

### #lgaussian function with Box-Cox transform

```
ZnCd.lgau2 <- drm(IR~conc, data=ZnCd, fct=lgaussian(), na.action=na.omit, bcVal = 0, bcAdd = 10)
```

```
summary(ZnCd.lgau2)
```

Model fitted: Log-Gaussian (5 parms)

Parameter estimates:

|               | Estimate  | Std. Error | t-value    | p-value |
|---------------|-----------|------------|------------|---------|
| b:(Intercept) | 0.555188  | 0.015215   | 36.489732  | 0.000   |
| c:(Intercept) | -0.290451 | 0.583670   | -0.497628  | 0.626   |
| d:(Intercept) | 42.910857 | 0.943991   | 45.456837  | 0.000   |
| e:(Intercept) | 2.321820  | 0.012425   | 186.867587 | 0.000   |
| f:(Intercept) | 2.024344  | 0.134982   | 14.997109  | 0.000   |

Residual standard error:

0.02654068 (15 degrees of freedom)

Non-normality/heterogeneity adjustment through optimal Box-Cox transformation

Specified lambda: 0

### #Model checking

```
plot(fitted(ZnCd.lgau2), residuals(ZnCd.lgau2), ylim = c(-0.06, 0.06))
```

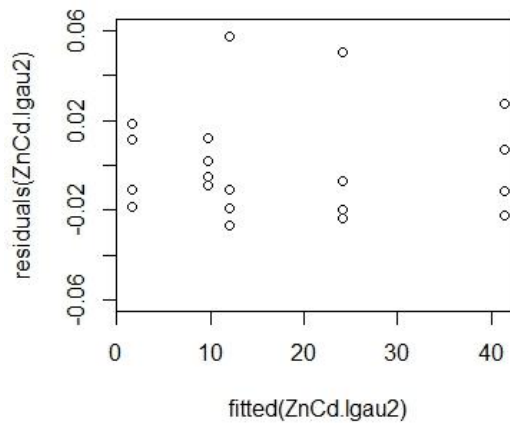

### #Plot:

```
plot(ZnCd.gau, type = "obs", col= "black", ylim = c(0, 300))
```

```
plot(ZnCd.gau, type = "none", add = TRUE, col = "red")
```

```
plot(ZnCd.gau2, type = "none", add = TRUE, col = "yellow")
```

```
plot(ZnCd.lgau, type = "none", add = TRUE, col = "blue")
```

```
plot(ZnCd.lgau2, type = "none", add = TRUE, col = "green")
```

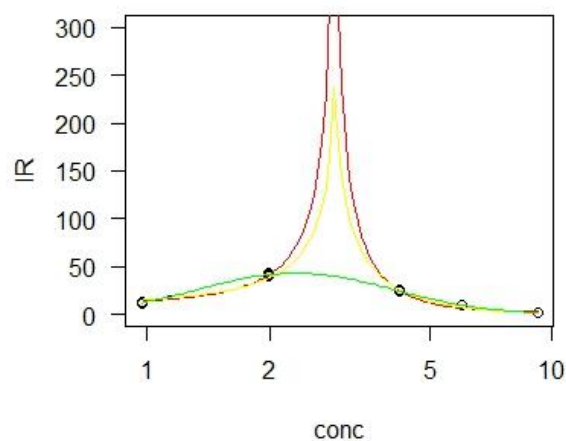

Based on the residuals standard errors and visual observation, we can infer that the LogGaussian with Box-Cox modification (green line) is the model that fits better the experimental data, therefore it will be used for fitting ZnCd response in the rest of calculations.

### #Effective doses ( $D(p)$ ) calculation:

```
ED(ZnCd.lgau2, -50, interval = "delta", bound = FALSE)
```

|       | Estimate | Std. Error | Lower    | Upper  |
|-------|----------|------------|----------|--------|
| 1:-50 | 1.209189 | 0.014632   | 1.178001 | 1.2404 |

```
ED(ZnCd.lgau2, 99.9, interval = "delta")
```

|        | Estimate | Std. Error | Lower    | Upper  |
|--------|----------|------------|----------|--------|
| 1:99.9 | 2.382456 | 0.015367   | 2.349703 | 2.4152 |

```
ED(ZnCd.lgau2, 50, interval = "delta")
```

|      | Estimate | Std. Error | Lower    | Upper  |
|------|----------|------------|----------|--------|
| 1:50 | 4.458236 | 0.053948   | 4.343248 | 4.5732 |

### #Additivity predictions and departures from additivity:

#### # $E(p)$ calculation

We apply the method to perform additivity predictions and to study the nature of the interaction through the *indicesFct* {drc} command. The first datum that has to be indicated is the ratio in which metals are present in the mixture. After that, we have to introduce the list with the model equations fitted for the mixture and the individual metals, respectively. The ratio only has to be indicated for the individual metal indicated first. (For example, in the case below, the ratio Zn: Cd is 0.355:0.645, therefore, as Zn is the first individual metal introduced, we indicated is 0.355 as ratio data). In c() vector we indicated the fractional effect ( $p$ ) which we want to be considered.

```
indicesFct(0.355, list(ZnCd.lgau2, Zn.lgau2, Cd.lgau2), c(-0.2, -0.5, -1, -2, -5, -10, -20, -30, -40, -50, -60, -70, -80, -90, -99, 99, 80, 70, 60, 50, 40, 30, 20, 10, 5, 2, 1, 0.5, 0.2))
```

**#ECmat:** Matrix with the fitted nonlinear regression model equations concentration data for the mixture (ECmix, Zn: Cd), the first individual metal indicated (EC1, Zn) and the second individual metal indicated (EC2, Cd) and the standard error, respectively. These data correspond to the  $D(p)$  data for all the fractional effect indicated in indicesFct.

**#Emat:** Matrix with the fitted nonlinear regression model equations effect data for the mixture (ECmix, Zn: Cd), the first individual metal indicated (EC1, Zn) and the second individual metal indicated (EC2, Cd) and the standard error, respectively. These data correspond to the  $E(p)$  data for all the fractional effect indicated.

```
#ECmat
```

```
$ECmat
  ECmix  EC1  EC2  SEMix  SE1  SE2
-0.2 0.3377212 0.9063974 1.038593 0.04011755 0.13046075 0.14144360
-0.5 0.3908416 0.9554918 1.155985 0.03941034 0.11453523 0.13457294
-1 0.4403353 0.9982981 1.262736 0.03821894 0.10068741 0.12756483
-2 0.5008234 1.0475599 1.390481 0.03621944 0.08504322 0.11864606
-5 0.6052838 1.1265598 1.605791 0.03175981 0.06167670 0.10360652
-10 0.7130718 1.2020991 1.823015 0.02636580 0.04433297 0.09065132
-20 0.8635123 1.3004321 2.121074 0.01865975 0.03990628 0.08155946
-30 0.9854817 1.3758876 2.360446 0.01376951 0.05191294 0.08431427
```

```

-40 1.0980212 1.4431499 2.580827 0.01236843 0.06724096 0.09380770
-50 1.2091890 1.5080376 2.799017 0.01463218 0.08284889 0.10714382
-60 1.3247947 1.5744593 3.027361 0.01900860 0.09824789 0.12269719
-70 1.4513381 1.6465755 3.280125 0.02418490 0.11340309 0.13948356
-80 1.5994438 1.7311354 3.581510 0.02937550 0.12816148 0.15641649
-90 1.7951676 1.8452853 3.993509 0.03323070 0.14111191 0.17001128
-99 2.1420593 2.0701401 4.797048 0.02491718 0.13005296 0.14361250
99 2.5166671 2.4348518 5.945510 0.02927474 0.15296534 0.17799479
80 3.3704531 2.9116638 7.963371 0.06190199 0.21555976 0.34778696
70 3.7144001 3.0611923 8.695064 0.06189626 0.21083069 0.36974764
60 4.0691968 3.2014066 9.421043 0.05838621 0.19977109 0.38182950
50 4.4582362 3.3424130 10.189613 0.05394832 0.18362621 0.39004910
40 4.9096050 3.4926962 11.051070 0.05530320 0.16273586 0.40168347
30 5.4702694 3.6634419 12.082839 0.07643259 0.13822354 0.43159454
20 6.2429337 3.8760073 13.446443 0.13490439 0.11894280 0.51704222
10 7.5600385 4.1930688 15.644902 0.27953208 0.15463881 0.77795888
5 8.9063184 4.4742271 17.761275 0.46732288 0.24495419 1.14596724
2 10.7639755 4.8116429 20.511540 0.77844851 0.39061976 1.75019587
1 12.2426021 5.0490772 22.586587 1.06259775 0.50924519 2.28175498
0.5 13.7929269 5.2752772 24.672378 1.39080342 0.63234981 2.87221259
0.2 15.9624260 5.5610094 27.461096 1.89615994 0.80041434 3.73986448

```

\$Emat

```

      Emix   E1   E2  SEmix  SE1  SE2
-0.2 -0.2040480 1.633213 1.137063 0.5205959 0.4644456 0.2752171
-0.5 -0.0744441 1.869085 1.283130 0.4604050 0.7311427 0.2751321
-1 0.1415624 2.262205 1.526575 0.3871991 1.2358878 0.3226767
-2 0.5735755 3.048445 2.013464 0.2880300 2.0127812 0.4429080
-5 1.8696147 5.407164 3.474132 0.1717987 3.3361324 0.6960765
-10 4.0296801 9.338364 5.908579 0.2052600 4.1595662 0.8915007
-20 8.3498109 17.200764 10.777473 0.2567516 4.0115727 1.0526113
-30 12.6699416 25.063163 15.646367 0.3034367 3.2581518 1.2316369
-40 16.9900724 32.925563 20.515260 0.4120100 2.9174574 1.4676017
-50 21.3102031 40.787962 25.384154 0.5412729 3.3301463 1.6940712
-60 25.6303338 48.650362 30.253047 0.6439274 4.0714852 1.8533158
-70 29.9504646 56.512761 35.121941 0.6877660 4.7374010 1.9219699
-80 34.2705953 64.375161 39.990835 0.6544011 5.2893357 1.9432093
-90 38.5907261 72.237560 44.859728 0.5856322 6.2821053 2.1387117
-99 42.4788438 79.313720 49.241733 0.8282188 9.1805150 3.0337516
99 42.4788438 79.313720 49.241733 0.8505941 8.8935420 3.0498938
80 34.2705953 64.375161 39.990835 0.5437934 7.9318629 1.6544342
70 29.9504646 56.512761 35.121941 0.5390104 8.5289396 1.5638688
60 25.6303338 48.650362 30.253047 0.4828725 8.3180725 1.5340835
50 21.3102031 40.787962 25.384154 0.3876131 7.3784991 1.4919847
40 16.9900724 32.925563 20.515260 0.2912417 5.9051575 1.4375273
30 12.6699416 25.063163 15.646367 0.2511280 4.2123056 1.3878589
20 8.3498109 17.200764 10.777473 0.2655813 2.9172177 1.3277733
10 4.0296801 9.338364 5.908579 0.2112043 2.6130773 1.1303774
5 1.8696147 5.407164 3.474132 0.1460100 2.2864276 0.8458768
2 0.5735755 3.048445 2.013464 0.2697191 1.4925741 0.5097317
1 0.1415624 2.262205 1.526575 0.3772735 0.9548770 0.3522130
0.5 -0.0744441 1.869085 1.283130 0.4551203 0.6017063 0.2840370
0.2 -0.2040480 1.633213 1.137063 0.5183190 0.4483813 0.2753855

```

#CAx: data frame including a series of relevant parameters from the mixture models:

CAX\$ComInd is the Combination Index calculated for the dose dimension for each p level, CAX\$seCI is the standard errors of the combination index, CAX\$Diff is the difference from 1 of the Combination index, CAX\$CAdiffp: p-value of the two tailed Student T-test of the Null hypothesis  $CI=1$ . CAX\$PredAdd is the prediction of the dose ( $D$ ) required to produce each p level under the hypothesis of additivity, and CAX\$sePredAdd is the standard error of the dose ( $D$ ) required to produce each p level under the hypothesis of additivity.

**#CAy:** The same that #CAx but for the empirical effect (E) axis.



## CAx

|      | combInd   | seCI       | CAdiff      | ciloCAdiff | cihiCAdiff | CAdiffp      | PredAdd   | sePredAdd  |
|------|-----------|------------|-------------|------------|------------|--------------|-----------|------------|
| -0.2 | 0.3420080 | 0.05318707 | -0.65799204 | 0.2377613  | 0.4462546  | 0.000000e+00 | 0.987466  | 0.09911044 |
| -0.5 | 0.3632882 | 0.04784768 | -0.63671184 | 0.2695067  | 0.4570696  | 0.000000e+00 | 1.075845  | 0.09115646 |
| -1   | 0.3815069 | 0.04315301 | -0.61849311 | 0.2969270  | 0.4660868  | 0.000000e+00 | 1.154200  | 0.08371682 |
| -2   | 0.4020365 | 0.03779096 | -0.59796346 | 0.3279663  | 0.4761068  | 0.000000e+00 | 1.245716  | 0.07480133 |
| -5   | 0.4338613 | 0.02955270 | -0.56613872 | 0.3759380  | 0.4917846  | 0.000000e+00 | 1.395109  | 0.06059542 |
| -10  | 0.4628736 | 0.02259682 | -0.53712644 | 0.4185838  | 0.5071633  | 0.000000e+00 | 1.540533  | 0.04910660 |
| -20  | 0.4983135 | 0.01643862 | -0.50168648 | 0.4660938  | 0.5305332  | 0.000000e+00 | 1.732870  | 0.04319287 |
| -30  | 0.5235555 | 0.01542966 | -0.47644447 | 0.4933134  | 0.5537977  | 0.000000e+00 | 1.882287  | 0.04884191 |
| -40  | 0.5445192 | 0.01718988 | -0.45548075 | 0.5108271  | 0.5782114  | 0.000000e+00 | 2.016497  | 0.05946825 |
| -50  | 0.5632927 | 0.02011918 | -0.43670733 | 0.5238591  | 0.6027263  | 0.000000e+00 | 2.146644  | 0.07213750 |
| -60  | 0.5809637 | 0.02340490 | -0.41903632 | 0.5350901  | 0.6268373  | 0.000000e+00 | 2.280340  | 0.08584242 |
| -70  | 0.5982965 | 0.02666656 | -0.40170354 | 0.5460300  | 0.6505629  | 0.000000e+00 | 2.425784  | 0.10027830 |
| -80  | 0.6160407 | 0.02959570 | -0.38395927 | 0.5580332  | 0.6740483  | 0.000000e+00 | 2.596328  | 0.11525769 |
| -90  | 0.6352995 | 0.03143490 | -0.36470046 | 0.5736871  | 0.6969119  | 0.000000e+00 | 2.825703  | 0.12966401 |
| -99  | 0.6553495 | 0.02578785 | -0.34465050 | 0.6048053  | 0.7058937  | 0.000000e+00 | 3.268576  | 0.12286943 |
| 99   | 0.6399498 | 0.02556564 | -0.36005016 | 0.5898412  | 0.6900585  | 0.000000e+00 | 3.932601  | 0.15029770 |
| 80   | 0.6839299 | 0.03500694 | -0.31607013 | 0.6153163  | 0.7525435  | 0.000000e+00 | 4.928068  | 0.23544563 |
| 70   | 0.7062854 | 0.03399879 | -0.29371461 | 0.6396478  | 0.7729230  | 0.000000e+00 | 5.259064  | 0.23750546 |
| 60   | 0.7298207 | 0.03209315 | -0.27017933 | 0.6669181  | 0.7927232  | 0.000000e+00 | 5.575612  | 0.23176311 |
| 50   | 0.7557176 | 0.02961498 | -0.24428238 | 0.6976723  | 0.8137630  | 2.220446e-16 | 5.899341  | 0.21988492 |
| 40   | 0.7855666 | 0.02697002 | -0.21443342 | 0.7327053  | 0.8384278  | 1.776357e-15 | 6.249763  | 0.20268872 |
| 30   | 0.8220989 | 0.02531321 | -0.17790112 | 0.7724850  | 0.8717128  | 2.095213e-12 | 6.654029  | 0.18257472 |
| 20   | 0.8712462 | 0.02819427 | -0.12875384 | 0.8159854  | 0.9265069  | 4.955426e-06 | 7.165522  | 0.17260888 |
| 10   | 0.9517409 | 0.04511972 | -0.04825907 | 0.8633063  | 1.0401756  | 2.848093e-01 | 7.943378  | 0.23568287 |
| 5    | 1.0300894 | 0.06966783 | 0.03008942  | 0.8935405  | 1.1666384  | 6.658154e-01 | 8.646160  | 0.36895879 |
| 2    | 1.1326403 | 0.10816823 | 0.13264027  | 0.9206305  | 1.3446500  | 2.201082e-01 | 9.503437  | 0.59274946 |
| 1    | 1.2103851 | 0.14078794 | 0.21038505  | 0.9344407  | 1.4863294  | 1.350868e-01 | 10.114634 | 0.78322652 |
| 0.5  | 1.2887785 | 0.17615178 | 0.28877851  | 0.9435210  | 1.6340360  | 1.011356e-01 | 10.702325 | 0.98752619 |
| 0.2  | 1.3939205 | 0.22701557 | 0.39392053  | 0.9489700  | 1.8388711  | 8.270296e-02 | 11.451461 | 1.27584661 |

\$CAy

|      | combInd    | seCI         | CAdiff      | ciloCAdiff    | cihiCAdiff | CAdiffp      | PredAdd   | sePredAdd |  |
|------|------------|--------------|-------------|---------------|------------|--------------|-----------|-----------|--|
| -0.2 | -6.246141  | 15.98104655  | -7.2461407  | -37.56899190  | 25.076711  | 6.502457e-01 | 1.274513  | 0.2445852 |  |
| -0.5 | -19.394622 | 120.00348198 | -20.3946216 | -254.60144624 | 215.812203 | 8.650493e-01 | 1.443815  | 0.2728977 |  |
| -1   | 12.191095  | 33.44643940  | 11.1910951  | -53.36392614  | 77.746116  | 7.379287e-01 | 1.725801  | 0.3687187 |  |
| -2   | 3.991448   | 2.21941650   | 2.9914484   | -0.35860794   | 8.341505   | 1.777055e-01 | 2.289397  | 0.5466498 |  |
| -5   | 2.128313   | 0.50514537   | 1.1283131   | 1.13822818    | 3.118398   | 2.550674e-02 | 3.979126  | 0.8707750 |  |
| -10  | 1.686106   | 0.28392387   | 0.6861065   | 1.12961568    | 2.242597   | 1.566985e-02 | 6.794470  | 1.0905217 |  |
| -20  | 1.488006   | 0.14727617   | 0.4880064   | 1.19934505    | 1.776668   | 9.212100e-04 | 12.424572 | 1.1688759 |  |
| -30  | 1.424987   | 0.10187579   | 0.4249871   | 1.22531058    | 1.624664   | 3.024410e-05 | 18.054504 | 1.2161818 |  |
| -40  | 1.394013   | 0.08747537   | 0.3940133   | 1.22256162    | 1.565465   | 6.659910e-06 | 23.684387 | 1.3707492 |  |
| -50  | 1.375597   | 0.08196254   | 0.3755970   | 1.21495038    | 1.536244   | 4.593528e-06 | 29.314251 | 1.5799862 |  |
| -60  | 1.363389   | 0.07675733   | 0.3633885   | 1.21294418    | 1.513833   | 2.198644e-06 | 34.944103 | 1.7605632 |  |
| -70  | 1.354702   | 0.06969076   | 0.3547019   | 1.21810797    | 1.491296   | 3.587174e-07 | 40.573950 | 1.8677796 |  |
| -80  | 1.348205   | 0.06198961   | 0.3482051   | 1.22670549    | 1.469705   | 1.941297e-08 | 46.203793 | 1.9325552 |  |
| -90  | 1.343163   | 0.05981961   | 0.3431629   | 1.22591650    | 1.460409   | 9.657907e-09 | 51.833633 | 2.1703342 |  |
| -99  | 1.339502   | 0.07761812   | 0.3395018   | 1.18737028    | 1.491633   | 1.219894e-05 | 56.900487 | 3.1048805 |  |
| 99   | 1.339502   | 0.07750054   | 0.3395018   | 1.18760072    | 1.491403   | 1.183326e-05 | 56.900487 | 3.0886847 |  |
| 80   | 1.348205   | 0.06306100   | 0.3482051   | 1.22460557    | 1.471805   | 3.356992e-08 | 46.203793 | 2.0329821 |  |
| 70   | 1.354702   | 0.07300699   | 0.3547019   | 1.21160816    | 1.497796   | 1.182997e-06 | 40.573950 | 2.0610678 |  |
| 60   | 1.363389   | 0.08273892   | 0.3633885   | 1.20122026    | 1.525557   | 1.123176e-05 | 34.944103 | 2.0158471 |  |
| 50   | 1.375597   | 0.09101584   | 0.3755970   | 1.19720591    | 1.553988   | 3.679729e-05 | 29.314251 | 1.8648365 |  |
| 40   | 1.394013   | 0.09968792   | 0.3940133   | 1.19862501    | 1.589402   | 7.734919e-05 | 23.684387 | 1.6443250 |  |
| 30   | 1.424987   | 0.11575340   | 0.4249871   | 1.19811046    | 1.651864   | 2.411433e-04 | 18.054504 | 1.4222600 |  |
| 20   | 1.488006   | 0.15814184   | 0.4880064   | 1.17804835    | 1.797964   | 2.029524e-03 | 12.424572 | 1.2599316 |  |
| 10   | 1.686106   | 0.28267095   | 0.6861065   | 1.13207141    | 2.240142   | 1.521475e-02 | 6.794470  | 1.0819760 |  |
| 5    | 2.128313   | 0.47901587   | 1.1283131   | 1.18944201    | 3.067184   | 1.849871e-02 | 3.979126  | 0.8399322 |  |
| 2    | 3.991448   | 2.08412857   | 2.9914484   | -0.09344358   | 8.076340   | 1.511881e-01 | 2.289397  | 0.5196061 |  |
| 1    | 12.191095  | 32.58457772  | 11.1910951  | -51.67467725  | 76.056867  | 7.312618e-01 | 1.725801  | 0.3510270 |  |
| 0.5  | -19.394622 | 118.62396439 | -20.3946216 | -251.89759175 | 213.108349 | 8.634952e-01 | 1.443815  | 0.2646745 |  |
| 0.2  | -6.246141  | 15.91107245  | -7.2461407  | -37.43184268  | 24.939561  | 6.488107e-01 | 1.274513  | 0.2433053 |  |

**#Plot the CI for the x axis:**

```
plotFACI(0.355,list(ZnCd.lgau2, Zn.lgau2, Cd.lgau2), "x", ylim = c(-0.2, 2.2), faValues = c(-10, -20, -30, -40, -50, -60, -70, -80, -90, -99, 99, 90, 80, 70, 60, 50, 40, 30, 20, 10), showPoints = TRUE)
```

```
title("Combination index for x axis")
```

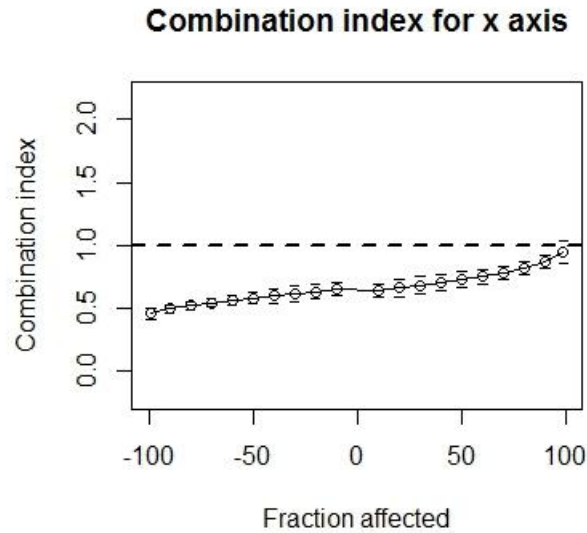

**#Plot CI for the y axis**

```
plotFACI(0.355,list(ZnCd.lgau2, Zn.lgau2, Cd.lgau2), "y", ylim = c(-0.2, 2.2), faValues = c(-10, -20, -30, -40, -50, -60, -70, -80, -90, -99, 99, 90, 80, 70, 60, 50, 40, 30, 20, 10), showPoints = TRUE)
```

```
title("Combination index for y axis")
```

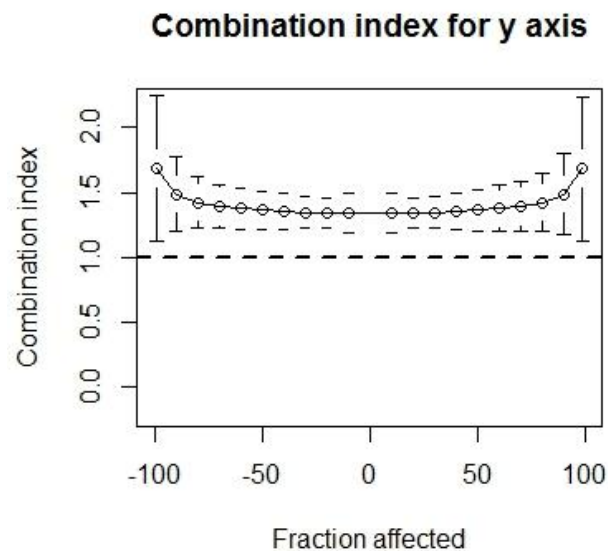

**Supplementary Material SM4 (Figure).**

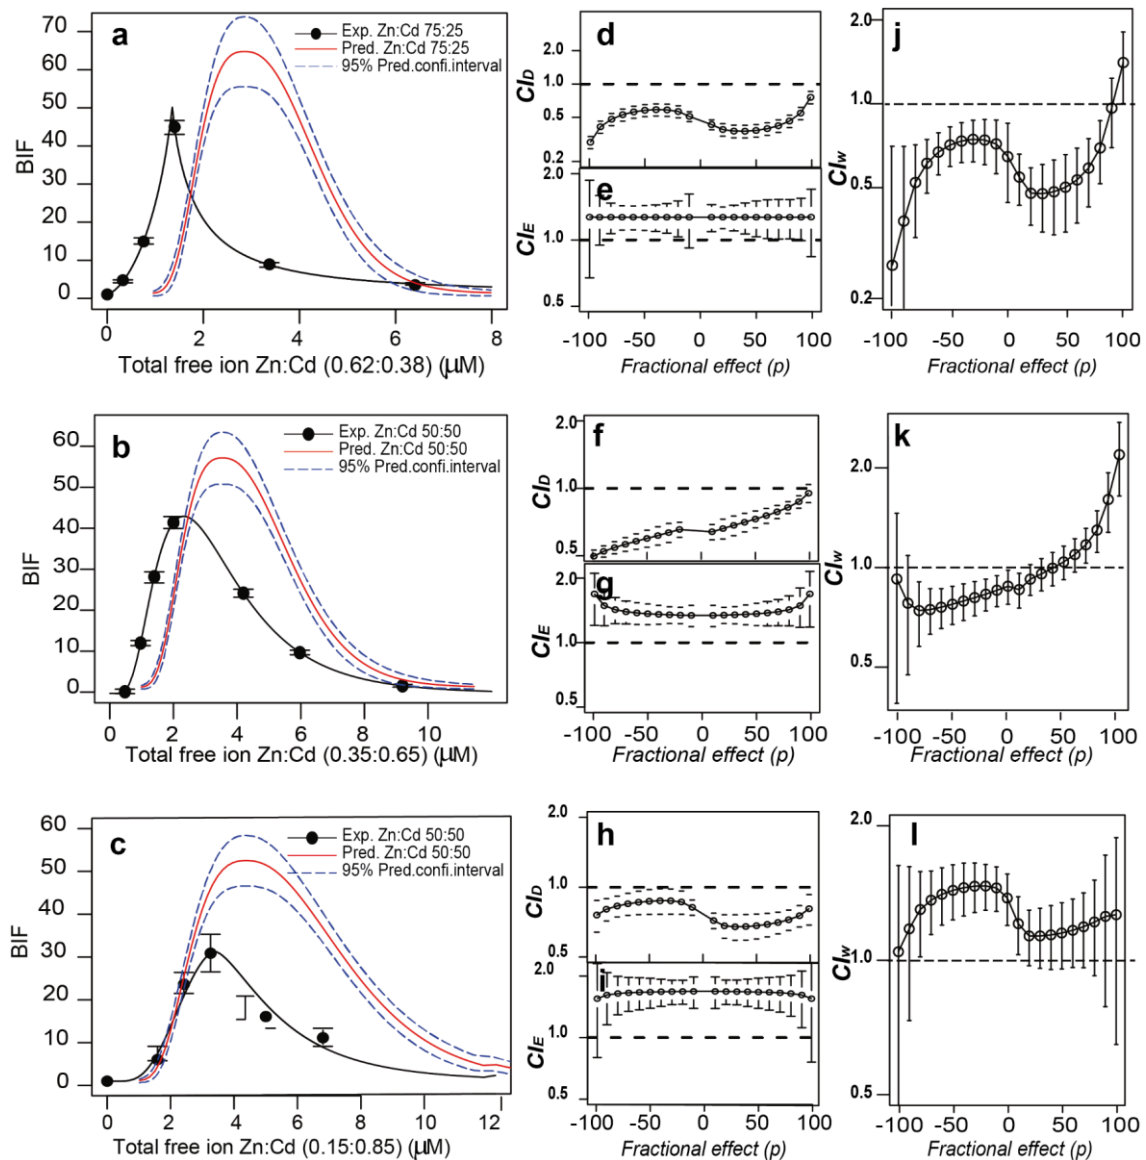

**Effect of mixture ratio for the Zn:Cd binary mixture.** Experimental vs predicted (under additivity) dose-response patterns for the mixture Zn:Cd at 75:25 (a), 50:50 (b) and 25:75 (c) mixture ratios based on the  $D_0$  concentration of the metals. Extended  $p$ -CI plots presenting departures from additivity (as CI values) as a function of the effect level ( $p$ ) for the  $D$  dimension (d, f, h), and the  $E$  dimension (e, g, i). Extended  $p$ - $CI_w$  plots presenting weighted departures from additivity (as  $CI_w$  values) as a function of the effect level ( $p$ ) for the binary mixture Zn:Cd at 75:25 (j), 50:50 (k), 25:75 (l) mixture ratios. Error bars are standard errors ( $n = 3-4$ ). Total free ion concentrations presented in the Figures are those presented as  $ED_0$  in Supplementary Material SM2 corrected by MINTEQ calculations due to the presence of the two metals used in each mixture.

**Supplementary Material SM5 (Table).** Combination index (CI) values for the dose (*D*) and empirical effect (*E*) dimensions together with relevant statistical information for 3 selected fractional effect levels (*p*) of the 15 binary metal mixtures of Cu, Cd, Zn, Cu, Hg and Co.

| <b>Metal mixture</b> | Fractional affect ( <i>p</i> ) | CI <sub>D</sub> | <i>p</i> -values | CI <sub>E</sub> | <i>p</i> -values | CI <sub>w</sub>        |
|----------------------|--------------------------------|-----------------|------------------|-----------------|------------------|------------------------|
| Cu:Cd                | -50                            | 0.89± 0.05      | 0.03             | 1.48± 0.15      | < 0.01           | 1.32± 0.2              |
|                      | 0                              | 0.86± 0.03      | < 0.01           | 1.52± 0.14      | < 0.01           | 1.31±0.17              |
|                      | 50                             | 0.77± 0.03      | < 0.01           | 1.48± 0.18      | < 0.01           | 1.14±0.21              |
| Cu:Zn                | -50                            | 1.28± 0.05      | < 0.01           | 0.71± 0.08      | < 0.01           | 0.91±0.13              |
|                      | 0                              | 1.11± 0.04      | < 0.01           | 0.7± 0.08       | < 0.01           | 0.77± 0.12             |
|                      | 50                             | 1.07± 0.04      | 0.04             | 0.71±0.13       | 0.02             | 0.76±0.17              |
| Zn:Cd                | -50                            | 0.56± 0.02      | < 0.01           | 1.37± 0.08      | < 0.01           | 0.77±0.1               |
|                      | 0                              | 0.64± 0.02      | < 0.01           | 1.34± 0.08      | < 0.01           | 0.86±0.1               |
|                      | 50                             | 0.75± 0.03      | < 0.01           | 1.37± 0.09      | < 0.01           | 1.03±0.12              |
| Cu:Hg                | -50                            | 1.18±0.07       | < 0.01           | 0.58±0.06       | < 0.01           | 0.68±0.13              |
|                      | 0                              | 1.89±0.07       | < 0.01           | 0.59±0.03       | < 0.01           | 1.11±0.10              |
|                      | 50                             | 2.19±0.13       | < 0.01           | 0.58±0.05       | < 0.01           | 1.27±0.18              |
| Co:Cd                | -50                            | 1.05 ± 0.03     | 0.01             | 1.03±0.09       | 0.76             | 1.08±0.12              |
|                      | 0                              | 0.73± 0.02      | < 0.01           | 1.04±0.06       | 0.45             | 0.76±0.08              |
|                      | 50                             | 0.53± 0.02      | < 0.01           | 1.03±0.06       | 0.68             | 0.54±0.08              |
| Hg:Cd                | -50                            | 1.39±0.06       | < 0.01           | 0.69±0.06       | < 0.01           | 0.95±0.12              |
|                      | 0                              | 1.22±0.02       | < 0.01           | 0.69±0.04       | < 0.01           | 0.84±0.06              |
|                      | 50                             | 1.04±0.05       | < 0.01           | 0.69±0.05       | < 0.01           | 0.72±0.10              |
| Ag:Cd                | -50                            | 1.41±0.04       | < 0.01           | 0.64±0.04       | < 0.01           | 0.9±0.08               |
|                      | 0                              | 1.07±0.02       | < 0.01           | 0.64±0.04       | < 0.01           | 0.68±0.06              |
|                      | 50                             | 0.73±0.02       | < 0.01           | 0.64±0.04       | < 0.01           | 0.47±0.06 <sup>§</sup> |
| Zn:Hg                | -50                            | 3.61±0.23       | < 0.01           | 0.52±0.05       | < 0.01           | 1.87±0.28              |
|                      | 0                              | 3.10±0.07       | < 0.01           | 0.52±0.06       | < 0.01           | 1.61±0.13              |
|                      | 50                             | 2.45±0.16       | < 0.01           | 0.52±0.09       | < 0.01           | 1.27±0.25              |
| Hg:Co                | -50                            | 1.11±0.06       | < 0.01           | 0.29±0.09       | < 0.01           | 0.32±0.15 <sup>§</sup> |
|                      | 0                              | 1.24±0.04       | < 0.01           | 0.28±0.02       | < 0.01           | 0.35±0.06 <sup>§</sup> |
|                      | 50                             | 1.17±0.07       | < 0.01           | 0.29±0.02       | < 0.01           | 0.34±0.09 <sup>§</sup> |
| Cu:Ag                | -50                            | 1.13±0.03       | < 0.01           | 0.68±0.04       | < 0.01           | 0.77±0.07              |
|                      | 0                              | 0.97±0.02       | 0.02             | 0.68±0.04       | < 0.01           | 0.66±0.06              |
|                      | 50                             | 1.06±0.02       | < 0.01           | 0.68±0.09       | < 0.01           | 0.72±0.11              |
| Zn:Ag                | -50                            | 1.54±0.05       | < 0.01           | 0.62±0.05       | < 0.01           | 0.95±0.1               |
|                      | 0                              | 1.07±0.04       | < 0.01           | 0.61±0.06       | < 0.01           | 0.65±0.1               |
|                      | 50                             | 0.94±0.03       | 0.05             | 0.62±0.09       | < 0.01           | 0.57±0.12              |
| Hg:Ag                | -50                            | 1.26±0.06       | < 0.01           | 1.62±0.10       | < 0.01           | 2.04±0.16 <sup>§</sup> |
|                      | 0                              | 1.32±0.03       | < 0.01           | 1.58±0.09       | < 0.01           | 2.08±0.12 <sup>§</sup> |
|                      | 50                             | 1.26±0.05       | < 0.01           | 1.62±0.25       | 0.01             | 2.04±0.3 <sup>§</sup>  |
| Co:Ag                | -50                            | 1.11±0.07       | 0.01             | 1.71±0.27       | < 0.01           | 1.9±0.34               |
|                      | 0                              | 1±0.05          | 0.94             | 1.87±0.18       | < 0.01           | 1.87±0.23              |
|                      | 50                             | 0.91±0.03       | < 0.01           | 1.71±0.16       | < 0.01           | 1.56±0.19              |
| Zn:Co                | -50                            | 1.1±0.04        | 0.02             | 0.50±0.05       | < 0.01           | 0.55±0.09              |
|                      | 0                              | 0.85±0.04       | < 0.01           | 0.49±0.03       | < 0.01           | 0.42±0.07 <sup>§</sup> |
|                      | 50                             | 0.7±0.03        | < 0.01           | 0.5±0.04        | < 0.01           | 0.35±0.07 <sup>§</sup> |
| Cu:Co                | -50                            | 0.92±0.03       | < 0.01           | 0.87±0.14       | 0.33             | 0.8±0.17               |
|                      | 0                              | 1.85±0.04       | < 0.01           | 0.88±0.06       | 0.04             | 1.63±0.1               |
|                      | 50                             | 1.60±0.03       | < 0.01           | 0.87±0.08       | 0.10             | 1.39±0.11              |

±: standard errors. For CI<sub>D</sub> and CI<sub>E</sub>, *P*-values were obtained using the function *Indices.fct* {drc}<sup>1</sup> which essentially performs a two-tailed Student's t-Test against the null hypothesis Ho: CI = 1. Statistical

significance is assumed to exist for  $p$ -values lesser than 0.05. For  $CI_w$ , it is not possible to directly perform a Student's  $t$ -Test since they are not directly computed with a dedicated *drc* function. In this case, statistical significance can be inferred from the absence of overlapping with 1 of the 95% confidence interval ( $IC_{95\%} = 1.95 \cdot \text{Estandard deviation}$ ) for each  $CI_w$  value. However, in the paper and in the present Table, the criteria for the analysis of departures from additivity for  $CI_w$  is based on the pragmatic thresholds:  $Exp < 0.5 \cdot CA$  (synergism) and  $Exp > 2 \cdot CA$  (antagonism)<sup>4,5</sup>, and it is marked by an <sup>§</sup>.

## References

- 1 Ritz, C. & Streibig, J. C. Bioassay Analysis using R. *Journal of statistical software* **12**, 17 (2005).
- 2 The R Stats Package v. 3.3.0 (2015).
- 3 Martin-Betancor, K., Rodea-Palomares, I., Munoz-Martin, M. A., Leganes, F. & Fernandez-Pinas, F. Construction of a self-luminescent cyanobacterial bioreporter that detects a broad range of bioavailable heavy metals in aquatic environments. *Frontiers in microbiology* **6**, 186, doi:10.3389/fmicb.2015.00186 (2015).
- 4 Altenburger, R., Backhaus, T., Boedeker, W., Faust, M. & Scholze, M. Simplifying complexity: Mixture toxicity assessment in the last 20 years. *Environmental toxicology and chemistry / SETAC* **32**, 1685-1687, doi:10.1002/etc.2294 (2013).
- 5 Cedergreen, N. Quantifying Synergy: A Systematic Review of Mixture Toxicity Studies within Environmental Toxicology. *PloS one* **9**, e96580, doi:10.1371/journal.pone.0096580 (2014).
